# Supplementary material
Source: PubMed Central journal article supplement (PMC4083207)
Supplement: 1400943_JI_1400943_Supplemental_Figures_1.pdf [file 1400943_JI_1400943_Supplemental_Figures_1.pdf]

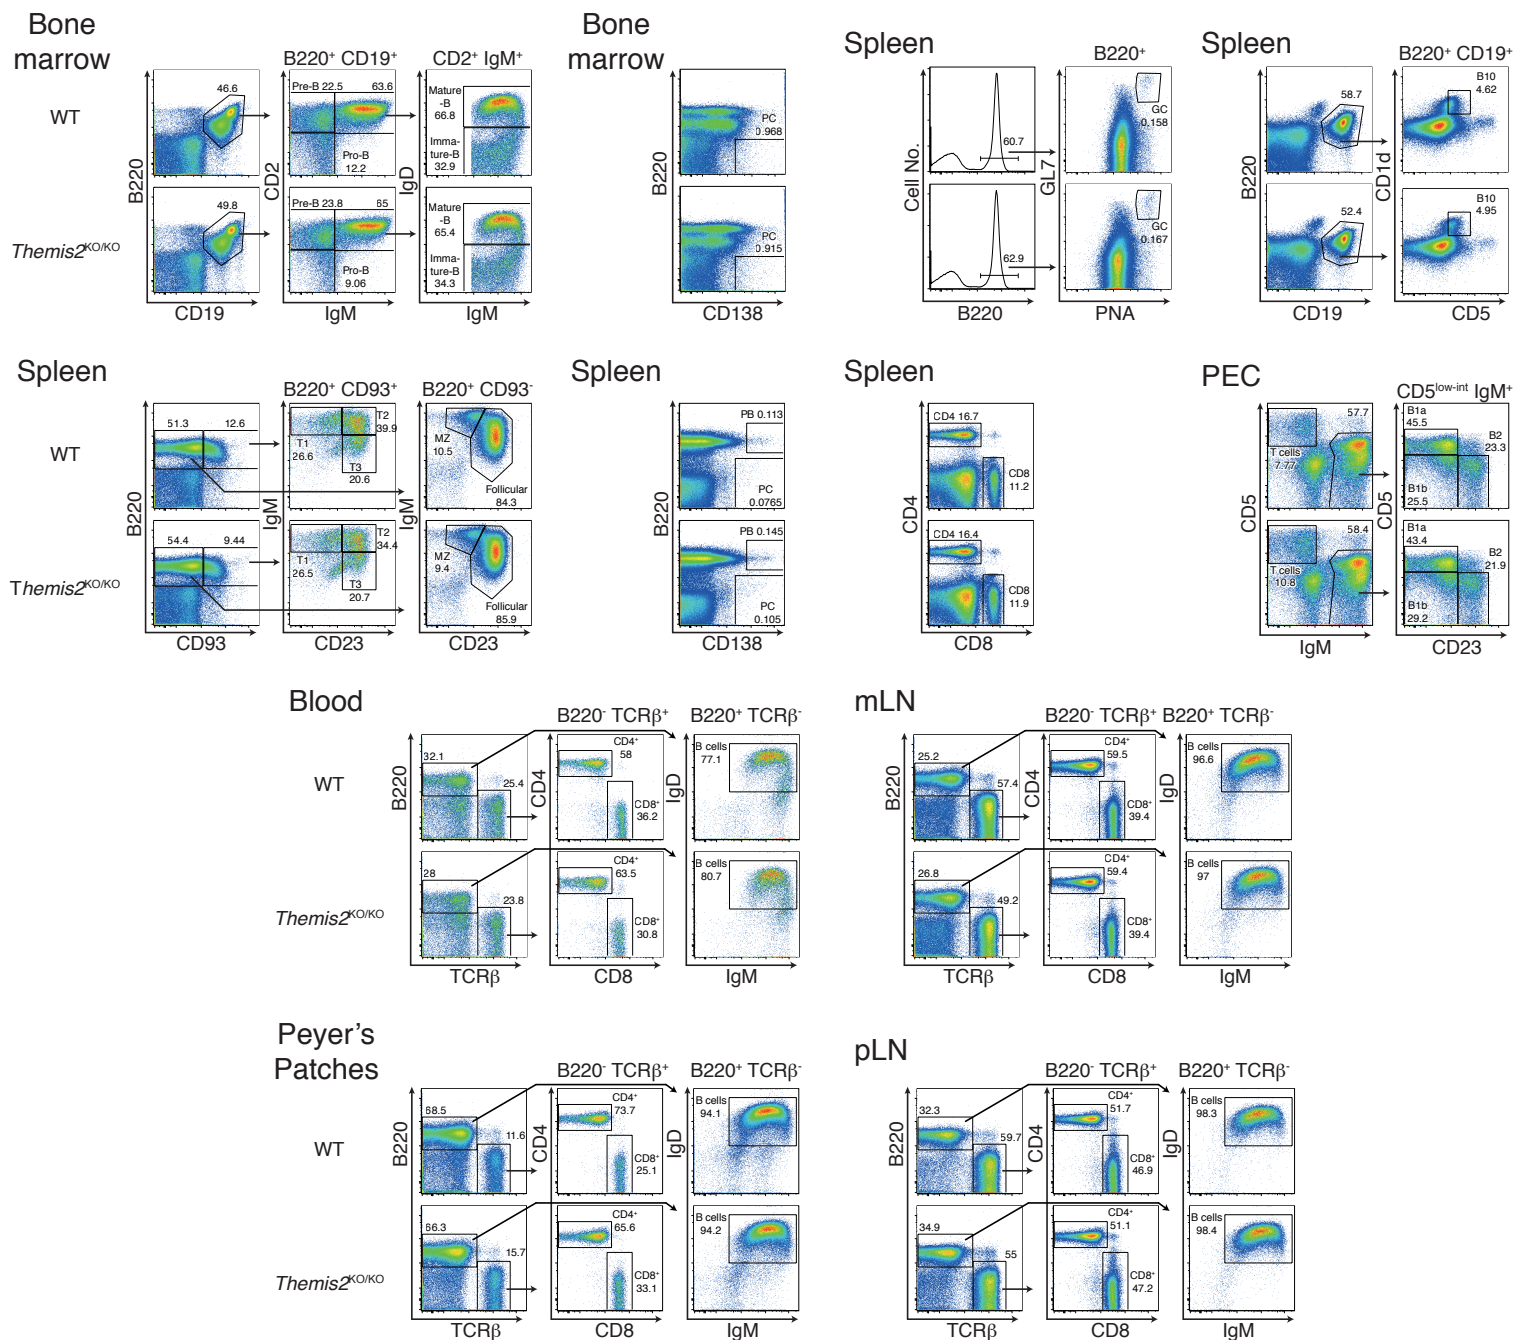

**Supplemental Figure 1. Normal B cell development in *Themis2<sup>KO/KO</sup>* mice.** Flow cytometric gating strategies used for sorting cell populations in Fig. 1 and determining cell numbers reported in Fig. 3. Names next to gates indicate the population; numbers beneath indicate the percentage of cells on the total plot falling within the marked gate. Gating strategies were as follows: in bone marrow, pro-B cells (B220+CD19+CD2-IgM-), pre-B cells (B220+CD19+CD2+IgM-), immature B cells (B220+CD19+CD2+IgM+IgD-), mature B cells (B220+CD19+CD2+IgM+IgD+); in spleen, transitional type 1 (T1, B220+CD93+CD23-IgM+), type 2 (T2, B220+CD93+CD23+IgM+) and type 3 (T3, B220+CD93+CD23+IgMlo) B cells, marginal zone B cells (MZ, B220+CD93-CD23-IgM+), follicular B cells (B220+CD93-CD23+IgM+), plasmablasts (PB, B220+CD138+) plasma cells (PC, B220-CD138+), germinal center B cells (GC, B220+PNA+GL7+) and B10 cells (B220+CD19+CD1d+CD5+), CD4 T cells (CD4+), CD8 T cells (CD8+); in peritoneal exudate cells (PEC), B1a cells (IgM+CD5+CD23-), B1b cells (IgM+CD5-CD23-) and B2 cells (IgM+CD5-CD23+), T cells (CD5+IgM-); blood, mesenteric lymph nodes (mLN), peripheral lymph nodes (pLN) and Peyer's patches, B cells (B220+TCRβ-IgM+IgD+), CD4 T cells (B220-TCRβ+CD4+CD8-), CD8 T cells (B220-TCRβ+CD4-CD8+).



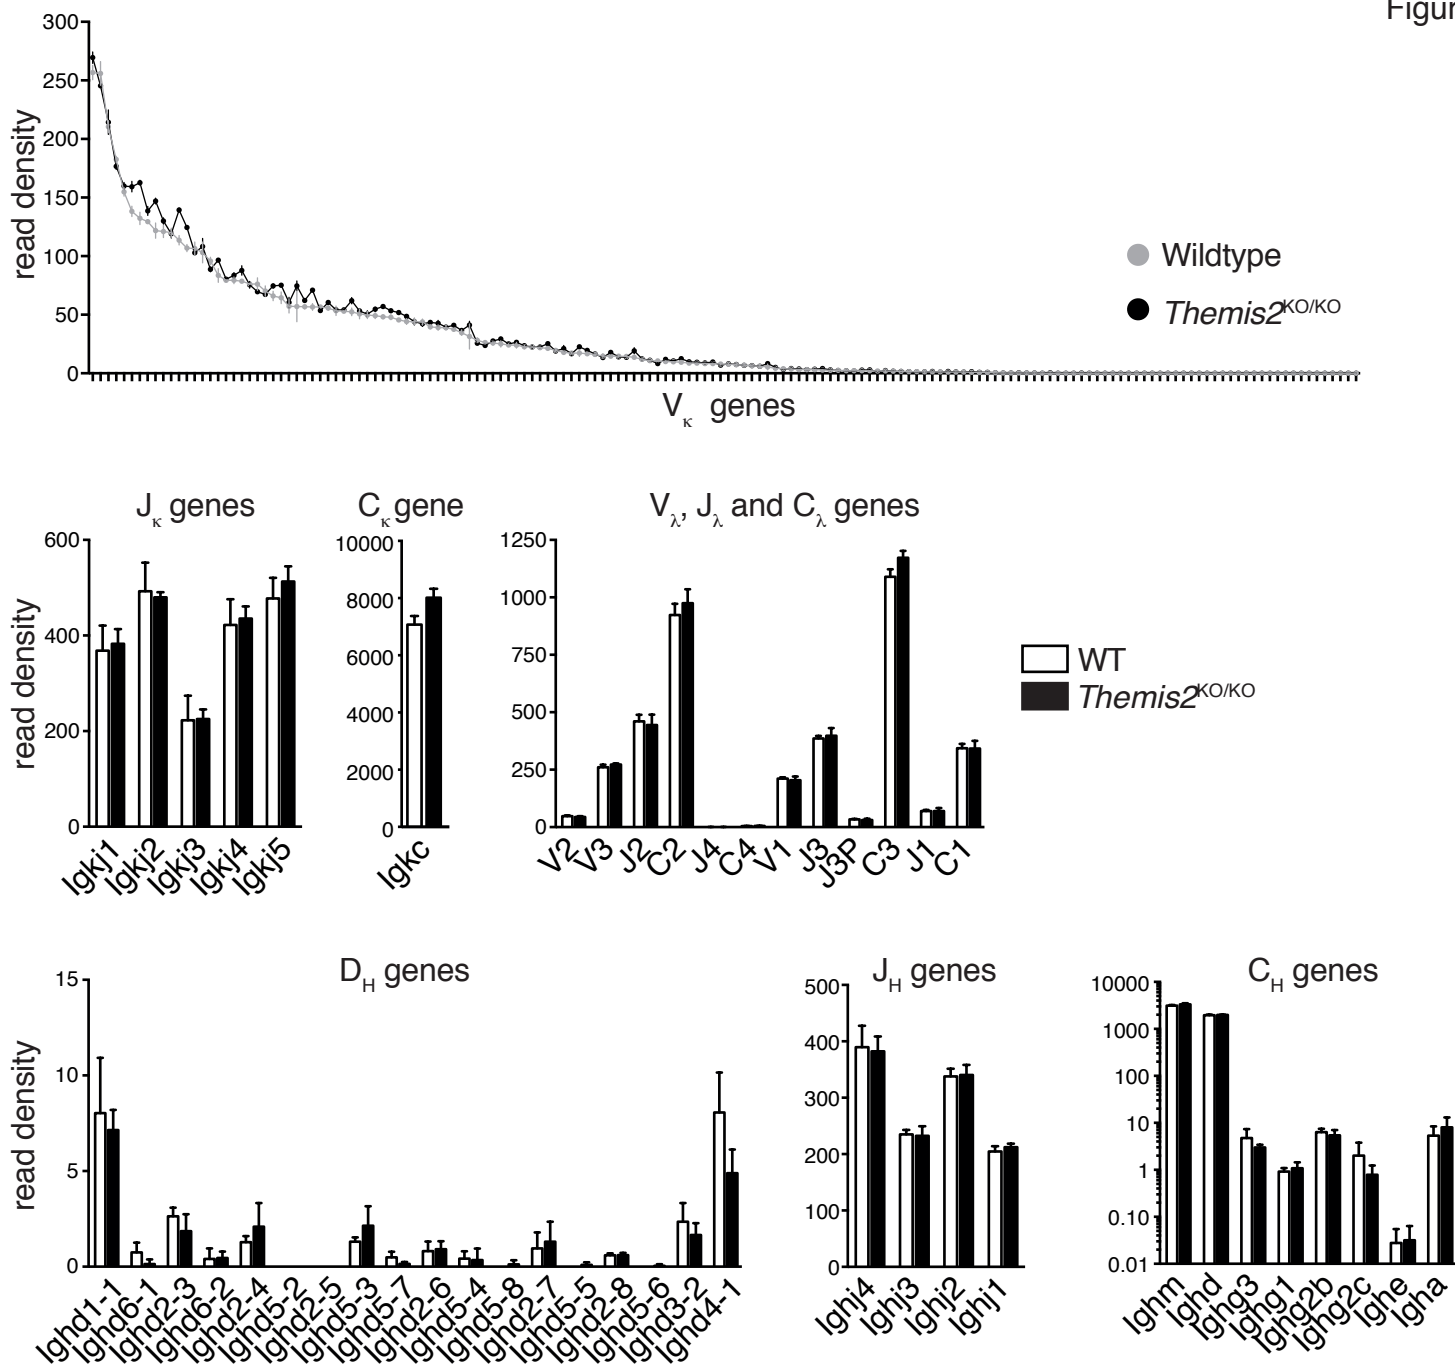

**Supplemental Figure 3. *Themis2*-deficient follicular B cells show no change in usage of immunoglobulin genes.** Expression of  $V_{\kappa}$ ,  $J_{\kappa}$ ,  $C_{\kappa}$ ,  $V_{\lambda}$ ,  $J_{\lambda}$ ,  $C_{\lambda}$ ,  $D_H$ ,  $J_H$  and  $C_H$  genes in splenic B cells from WT or *Themis2*<sup>KO/KO</sup> mice determined by RNAseq.  $V_{\kappa}$  genes are ordered by level expression in WT mice. Graphs show mean  $\pm$  SEM of 3 biological replicates.
